# Supplementary material
Source: publisher figshare collection journal article supplement (https://tandf.figshare.com/ndownloader/files/14657591)
Supplement: Supplementary file 1 [file 14657591]

Supplementary Figure 1. Sample GC output of milk fatty acid methyl ester (FAME)1 profile from late lactation New Zealand (NZ) HF × J-cross cows grazing on pasture

1The individual FAME profile was identified by the peak retention time compared with external standards. Quantification of the peak areas was based on comparison with the internal standard (ISTD) C21:0.
